# Supplementary material for: Tsunamigenic potential of a Holocene submarine landslide along the North Anatolian Fault (northern Aegean Sea, off Thasos island): insights from numerical modelling
Source: Copernicus journal article supplement (doi:10.5194/nhess-19-121-2019), 2019-01-16
Supplement: Supplementary file 1 [file nhess-19-121-2019-supplement.zip]

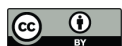

*Supplement of*

**Tsunamigenic potential of a Holocene submarine landslide along the North Anatolian Fault (northern Aegean Sea, off Thasos island): insights from numerical modelling**

**Alexandre Janin et al.**

*Correspondence to:* Alexandre Janin ([alexandre.janin@ens.fr](mailto:alexandre.janin@ens.fr))

- [nhess-19-121-2019-supplement-title-page.pdf](#)
- [VideoSup\\_Janin\\_AegeanTsunami-2017.mp4](#)

The copyright of individual parts of the supplement might differ from the CC BY 4.0 License.
